# Supplementary material
Source: PubMed Central journal article supplement (PMC7716254)
Supplement: jamaoncol-e206159-s001.pdf [file jamaoncol-e206159-s001.pdf]

## Supplementary Online Content

Hantel A, Marron JM, Casey M, Kurtz S, Magnavita E, Abel GA. US state government crisis standards of care guidelines: implications for patients with cancer. *JAMA Oncol*. Published online December 3, 2020.

doi:10.1001/jamaoncol.2020.6159

**eAppendix.** Methods

**eTable 1.** CSC Guideline Abstraction Outline

**eTable 2.** CSC Guideline Versions Dates and Cancer-Related Categorizations

**eFigure.** CSC Guideline Screening and Selection Process

**eReferences**

This supplementary material has been provided by the authors to give readers additional information about their work.

## **eAppendix. Methods**

### **a. Research Approach**

The research objective was to establish CSC guideline recommendations of a constructed social phenomenon, healthcare scarce resource allocation, which has a societal basis that assigns values but also has predetermined approaches. Therefore, a pragmatist paradigm was chosen to incorporate both constructivist and positivist aspects, which led to the choice of a mixed qualitative and quantitative research approach. The primary method was guideline abstraction, which was performed in duplicate with extraction of exemplar quotes and references to ensure accuracy and improve reliability. The chosen study population (state endorsed CSC guidelines) was preferred over other potential options (institutional CSC guidelines or physician group CSC guidelines) as state guidelines were most likely to come with liability protections, be enforceable, and apply to the entire U.S. population.

### **b. Search Strategy**

The goal of the search strategy was to identify guidelines that were publicly available, readily accessible, and state-endorsed. The public availability and ready accessibility goals were adapted from the “typical patient” search strategy<sup>1,2</sup> and were chosen to reflect how potential searchers would attempt to access such information. In such strategies, the search attempts are focused, relying on terms that are most likely to be used (as agreed upon by the investigators) rather than using an exhaustive list of terms, which is less likely to reflect that of a typical searcher. While additional relevant terms are available (such as “healthcare allocation” and “ventilator triage”), they were considered less likely to be used than those chosen.

The search engine queries were performed using the following terms at [www.google.com](http://www.google.com):

- <STATE> + crisis standards of care
- <STATE> + COVID triage
- <STATE> + pandemic triage

The topline state department of public health and emergency preparedness (or similar department) website reviews were performed by reviewing each department’s main web page, their web page of resources for healthcare professionals, and their web page of COVID-19-related resources. Relevant appearing links were accessed from these pages. If topline pages or secondary pages accessed through links did not have links to guidelines, they were not considered available and state-endorsed unless the search engine query was able to take the searcher to the state department page with the guideline. For the few states where more than one guideline was seen on the state website, the most recent guideline that provided triage methods was used. PDFs of guidelines found are available here: [https://www.dropbox.com/sh/w9m0w391ainiec0/AAD7QhbYhvvYo3w8y9yd\\_9nFa?dl=0](https://www.dropbox.com/sh/w9m0w391ainiec0/AAD7QhbYhvvYo3w8y9yd_9nFa?dl=0)

### **c. Guideline Abstraction Structure and Process**

Guidelines were first reviewed by study investigators to ensure that they included recommendations for healthcare scarce resource allocation. If there was no information or recommendations regarding allocation, the guideline was not included in the analyses.

The abstraction outline was reviewed and developed within the research team to ensure clarity and consistency. Generally, the abstraction process followed the structure of term searches within the PDF files of each guideline, starting with the terms listed in the Field and Possible Responses column of eTable 1, followed by manual reading and review of each guideline (and linked documents, as applicable) to ensure that variations on the search terms, other descriptions of the same concept using different terms, and text within pictures/figures were included. The full outline of fields abstracted and the instructions for coding is provided in **eTable 1**. The term “primary allocation” was defined as the principal goal(s) and method(s) of resource distribution and “secondary allocation” was defined as second or lower tier methods of resolving prioritization between patients considered similar during primary allocation. These terms do not reflect the division of field triage, hospital triage, and ICU triage, which can also be termed as primary, secondary, tertiary, etc. Abstractor pairs were selected to increase differential professional responsibilities and social backgrounds in order to reduce bias and increase validity.<sup>3</sup>

#### **d. Analysis**

Data Sources and Abstractions: Finalized dichotomous and categorical field responses from CSC guideline abstractions were extracted and quantized. 2017 Medicare Physician Compare National Downloadable File ( <https://data.medicare.gov/data/physician-compare> ) was used to identify the number of physicians per state whose specialty was listed as “gynecological oncology,” “hematology/oncology,” “hematopoietic cell transplantation and cellular therapy,” “medical oncology,” “radiation oncology,” “pediatric oncology,” and “surgical oncology.” Physicians were only counted once and were categorized as practicing in the state listed first. The U.S. Census Bureau American Community Survey ( <https://www.census.gov/programs-surveys/acs/news/data-releases.2017.html> ) was used to identify the total number of persons per state. The 1-year 2017 Data Release was used to ensure coherence with other sources. Similarly, 2017 data from the Surveillance, Epidemiology, and End Results (SEER) Program was obtained from the State Cancer Profiles tool. Complete prevalence counts were obtained for each state through the online tool ( <https://statecancerprofiles.cancer.gov/prevalence/index.php> ). The National Cancer Institute website ( <http://www.cancer.gov/research/nci-role/cancer-centers> ) was used to determine states with or without Comprehensive Cancer Centers. Hospital capacity projection data was obtained from the Harvard Global Health Initiative hospital capacity data by state ( <https://globalepidemics.org/our-data/hospital-capacity/> ), which used the same population datasets as those listed above. The percentages of potentially available hospital and ICU bed projections at 6 months were dichotomized into greater or less than 100% to assess if capacity would exceed the most conservative measure of capacity.

**eTable 1. CSC Guideline Abstraction Outline**

| Category                       | Field                                       | Response Type | Possible Responses | Reviewer Instructions                                                                                                                                                                                                                                                                              |
|--------------------------------|---------------------------------------------|---------------|--------------------|----------------------------------------------------------------------------------------------------------------------------------------------------------------------------------------------------------------------------------------------------------------------------------------------------|
| Guideline Publication          | Available                                   | Dichotomous   | Yes, No            | Yes if guideline is available using search strategy outlined and if contains provisions for healthcare resource allocation                                                                                                                                                                         |
|                                | Date Published                              | Date          | Date               | Listed date of publication, can use date listed on website if not listed on guideline itself. For guidelines with only month and/or year listed, use the first date of that month or year                                                                                                          |
|                                | Published/Updated since first US COVID Case | Dichotomous   | Yes, No            | Yes if guideline publication date was on or after January 21, 2020                                                                                                                                                                                                                                 |
|                                | Days Since Publication                      | Numerical     | Number             | Days between publication date and data-cutoff date                                                                                                                                                                                                                                                 |
|                                | First Reviewer                              | Categorical   | AH, JM, MK, SK, EM | Initials of reviewer                                                                                                                                                                                                                                                                               |
|                                | Second Reviewer                             | Categorical   | AH, JM, MK, SK, EM | Initials of reviewer                                                                                                                                                                                                                                                                               |
|                                | Oncologist in Task Force                    | Dichotomous   | Yes, No            | Yes if guideline taskforce member was an oncologist (if not listed as such, searched for on public search engine)                                                                                                                                                                                  |
|                                | Palliative Care Specialist in Task Force    | Dichotomous   | Yes, No            | Yes if guideline taskforce member was an palliative care specialist (if not listed as such, searched for on public search engine)                                                                                                                                                                  |
| Ethical Values & Principles    | N/A                                         | Qualitative   | Text               | List ethical values and principles listed in the guideline. Use search terms of IOM principles and describe by IOM language, if applicable.                                                                                                                                                        |
| Healthcare Resources Allocated | Ventilators                                 | Dichotomous   | Yes, No            | For this category, Yes if there was specific mention of this resource and how to allocate it. Does not need to constitute a whole separate policy but respond No if there was not mention of how to allocate the resource. In addition to manual review, searched for "ventilator", "respiratory". |
|                                | Renal Replacement Therapy                   | Dichotomous   | Yes, No            | In addition to manual review, searched for "dialysis" "renal" "kidney"                                                                                                                                                                                                                             |
|                                | Intravenous Fluids                          | Dichotomous   | Yes, No            | In addition to manual review, searched for "intravenous" "IV" "fluids" "resuscitation"                                                                                                                                                                                                             |
|                                | Blood Products                              | Dichotomous   | Yes, No            | In addition to manual review, searched for "blood" "transfusion" "bleeding"                                                                                                                                                                                                                        |
|                                | Mental / Behavioral Health                  | Dichotomous   | Yes, No            | In addition to manual review, searched for "mental" "behavioral" "psychiatric"                                                                                                                                                                                                                     |
|                                | Medications                                 | Dichotomous   | Yes, No            | In addition to manual review, searched for "medication" "drug"                                                                                                                                                                                                                                     |
|                                | Staffing                                    | Dichotomous   | Yes, No            | In addition to manual review, searched for "staffing" "worker" "personnel" "professional" "physician" "nurse"                                                                                                                                                                                      |
|                                | Palliative Care                             | Dichotomous   | Yes, No            | In addition to manual review, searched for "palliative" "palliation" "hospice"                                                                                                                                                                                                                     |

| Category                  | Field                                      | Response Type | Possible Responses      | Reviewer Instructions                                                                                                                                                                                                                                                                                                                                                                                                                                                                                                                            |
|---------------------------|--------------------------------------------|---------------|-------------------------|--------------------------------------------------------------------------------------------------------------------------------------------------------------------------------------------------------------------------------------------------------------------------------------------------------------------------------------------------------------------------------------------------------------------------------------------------------------------------------------------------------------------------------------------------|
| Primary Allocation Goal   | Lives Saved                                | Dichotomous   | Yes, No                 | Yes if the guideline stated this explicitly as a goal and/or used an algorithm, scoring system, or exclusion criteria that prioritized those with the intention of maximizing immediate survival.                                                                                                                                                                                                                                                                                                                                                |
|                           | Life Years Saved                           | Dichotomous   | Yes, No                 | Yes if the guideline stated this explicitly or used an algorithm, scoring system, or exclusion criteria that prioritized those with a higher likelihood of non-acute survival. Did not double count organ failure scores themselves (or exclusion criteria for conditions like cardiac arrest), as prioritizing life-years such that they were not double counted (e.g., if only SOFA was used without deprioritizations for comorbidities, responses were No, but if there were additional comorbidity considerations, then responses were Yes) |
|                           | Other Goal                                 | Categorical   | Lottery                 | Yes if the guideline stated this explicitly or used an algorithm or scoring system that incorporated it into the primary prioritizations.                                                                                                                                                                                                                                                                                                                                                                                                        |
|                           |                                            |               | First-Come/First-Served | Yes if the guideline stated this explicitly or used an algorithm or scoring system that incorporated it into the primary prioritizations.                                                                                                                                                                                                                                                                                                                                                                                                        |
|                           |                                            |               | Youngest First          | Yes if the guideline stated this explicitly or used an algorithm or scoring system that incorporated life-cycle considerations into the primary prioritizations.                                                                                                                                                                                                                                                                                                                                                                                 |
|                           |                                            |               | Reciprocity             | Yes if the guideline stated this explicitly or used an algorithm or scoring system that prioritized persons for past actions (e.g., for putting themselves at risk of COVID infection by being a healthcare worker) into the primary prioritizations.                                                                                                                                                                                                                                                                                            |
|                           |                                            |               | Instrumental Value      | Yes if the guideline stated this explicitly or used an algorithm or scoring system that prioritized persons for future usefulness (e.g., having skills that could be useful in treating COVID infections by being a healthcare worker) into the primary prioritizations.                                                                                                                                                                                                                                                                         |
| Primary Allocation Method | SOFA (or SOFA-family of scores)            | Dichotomous   | Yes, No                 | Yes if a SOFA-based score was used to prioritize patients as a primary means.                                                                                                                                                                                                                                                                                                                                                                                                                                                                    |
|                           | PELOD (or PELOD-family of scores)          | Dichotomous   | Yes, No                 | Yes if a PELOD-based score was used to prioritize patients as a primary means.                                                                                                                                                                                                                                                                                                                                                                                                                                                                   |
|                           | SNAPPE (or SNAPPE-family of scores)        | Dichotomous   | Yes, No                 | Yes if a SNAPPE-based score was used to prioritize patients as a primary means.                                                                                                                                                                                                                                                                                                                                                                                                                                                                  |
|                           | Description of Lives Saved Method          | Qualitative   | Text                    | Describe the method of allocation (e.g., SOFA score category + point for severe and major comorbid conditions, listed as...)                                                                                                                                                                                                                                                                                                                                                                                                                     |
|                           | Life Years Through Comorbidities/Prognosis | Dichotomous   | Yes, No                 | Yes if comorbid conditions or other non-acute means of prognosis were considered as a primary means of prioritization (e.g., list of comorbid conditions with poor 5-year survival)                                                                                                                                                                                                                                                                                                                                                              |
|                           | Life Years Through Age                     | Dichotomous   | Yes, No                 | Yes if age and/or life-cycle was used as a primary means of allocation                                                                                                                                                                                                                                                                                                                                                                                                                                                                           |
|                           | Description of Life Years Method           | Qualitative   | Text                    | Describe the method of allocation (see example above)                                                                                                                                                                                                                                                                                                                                                                                                                                                                                            |

|                             | Other Method                      | Qualitative   | Text               | Describe other allocation methods for states with other primary allocation goals.                                                                                                                                                                                                   |
|-----------------------------|-----------------------------------|---------------|--------------------|-------------------------------------------------------------------------------------------------------------------------------------------------------------------------------------------------------------------------------------------------------------------------------------|
| Category                    | Field                             | Response Type | Possible Responses | Reviewer Instructions                                                                                                                                                                                                                                                               |
| Secondary Allocation Goal   | Lives Saved                       | Dichotomous   | Yes, No            | Yes if the guideline stated this explicitly or used an algorithm or scoring system that incorporated it into the secondary or later prioritizations, see above for how lives saved should be assessed.                                                                              |
|                             | Life Years Saved                  | Dichotomous   | Yes, No            | Yes if the guideline stated this explicitly or used an algorithm or scoring system that incorporated it into the secondary or later prioritizations, see above for how life-years saved should be assessed.                                                                         |
|                             | Lottery                           | Dichotomous   | Yes, No            | Yes if the guideline stated this explicitly or used an algorithm or scoring system that incorporated it into the secondary or later prioritizations.                                                                                                                                |
|                             | First-Come/First-Served           | Dichotomous   | Yes, No            | Yes if the guideline stated this explicitly or used an algorithm or scoring system that incorporated it into the primary prioritizations.                                                                                                                                           |
|                             | Youngest First                    | Dichotomous   | Yes, No            | Yes if the guideline stated this explicitly or used an algorithm or scoring system that incorporated life-cycle considerations into the secondary or later prioritizations.                                                                                                         |
|                             | Reciprocity                       | Dichotomous   | Yes, No            | Yes if the guideline stated this explicitly or used an algorithm or scoring system that prioritized persons for past actions (e.g., for putting themselves at risk of COVID infection by being a healthcare worker) into the secondary or later prioritizations.                    |
|                             | Instrumental Value                | Dichotomous   | Yes, No            | Yes if the guideline stated this explicitly or used an algorithm or scoring system that prioritized persons for future usefulness (e.g., having skills that could be useful in treating COVID infections by being a healthcare worker) into the secondary or later prioritizations. |
| Secondary Allocation Method | N/A                               | Qualitative   | Text               | Describe other allocation methods for secondary or later prioritizations. Use terms stated above as applicable.                                                                                                                                                                     |
| Other Allocation Methods    | Use of Triage Team and/or Officer | Dichotomous   | Yes, No            | Yes if the guideline stated that clinical care should be separated from the process of allocation with the use of a triage officer, team, or other similarly purposed mechanism.                                                                                                    |
|                             | Allocation Appeals Process        | Dichotomous   | Yes, No            | Yes if the guideline stated that allocation decisions could be appealed.                                                                                                                                                                                                            |
|                             | Appeal Types and Timing           | Qualitative   | Text               | Description of what types of appeals were allowed and when they were allowed, if stated.                                                                                                                                                                                            |

| Category                                     | Field                                             | Response Type | Possible Responses                                                                          | Reviewer Instructions                                                                                                                                                                                                                                                          |
|----------------------------------------------|---------------------------------------------------|---------------|---------------------------------------------------------------------------------------------|--------------------------------------------------------------------------------------------------------------------------------------------------------------------------------------------------------------------------------------------------------------------------------|
| Disability Rights                            | Disability Rights Statement                       | Dichotomous   | Yes, No                                                                                     | Yes if there was at least a statement on rights for persons with disabilities pertaining to allocation considerations. If the word disability, disabled, or similar is not used, disabilities can be considered using the definition from the Americans with Disabilities Act. |
|                                              | Disability Rights Statement                       | Qualitative   | Text                                                                                        | Copied text or pages/lines of text discussing disability rights in allocation.                                                                                                                                                                                                 |
|                                              | Any Categorical Exclusions                        | Dichotomous   | Yes, No                                                                                     | Yes if there were any groups/conditions excluded prior to allocation prioritization apart from acute medical conditions (e.g., cardiac arrest, refractory shock, severe burns), using search terms or via manual review.                                                       |
|                                              | Statement of Categorical Exclusions               | Qualitative   | Text                                                                                        | Copied text or pages/lines of text discussing categorical exclusions.                                                                                                                                                                                                          |
|                                              | Standardized Ventilator Reassessment              | Dichotomous   | Yes, No                                                                                     | Yes if there were standardized times of ventilator reassessments.                                                                                                                                                                                                              |
|                                              | Cancer-related Categorical Exclusion              | Dichotomous   | Yes, No                                                                                     | Yes if cancer or a similar term describing patients with cancer was included in the categorical exclusions, above, using search terms or via manual review.                                                                                                                    |
|                                              | Statement of Cancer-related Categorical Exclusion | Qualitative   | Text                                                                                        | Copied text or pages/lines of text discussing cancer-related categorical exclusions.                                                                                                                                                                                           |
|                                              | Cancer-related Deprioritization                   | Dichotomous   | Yes, No                                                                                     | Yes if cancer or a similar term describing patients with cancer was included in the deprioritizations of patients during the primary or secondary allocation methods, above, using search terms or via manual review.                                                          |
| Statement of Cancer-related Deprioritization | Qualitative                                       | Text          | Copied text or pages/lines of text discussing cancer-related categorical deprioritizations. |                                                                                                                                                                                                                                                                                |

**eFigure.** CSC Guideline Screening and Selection Process

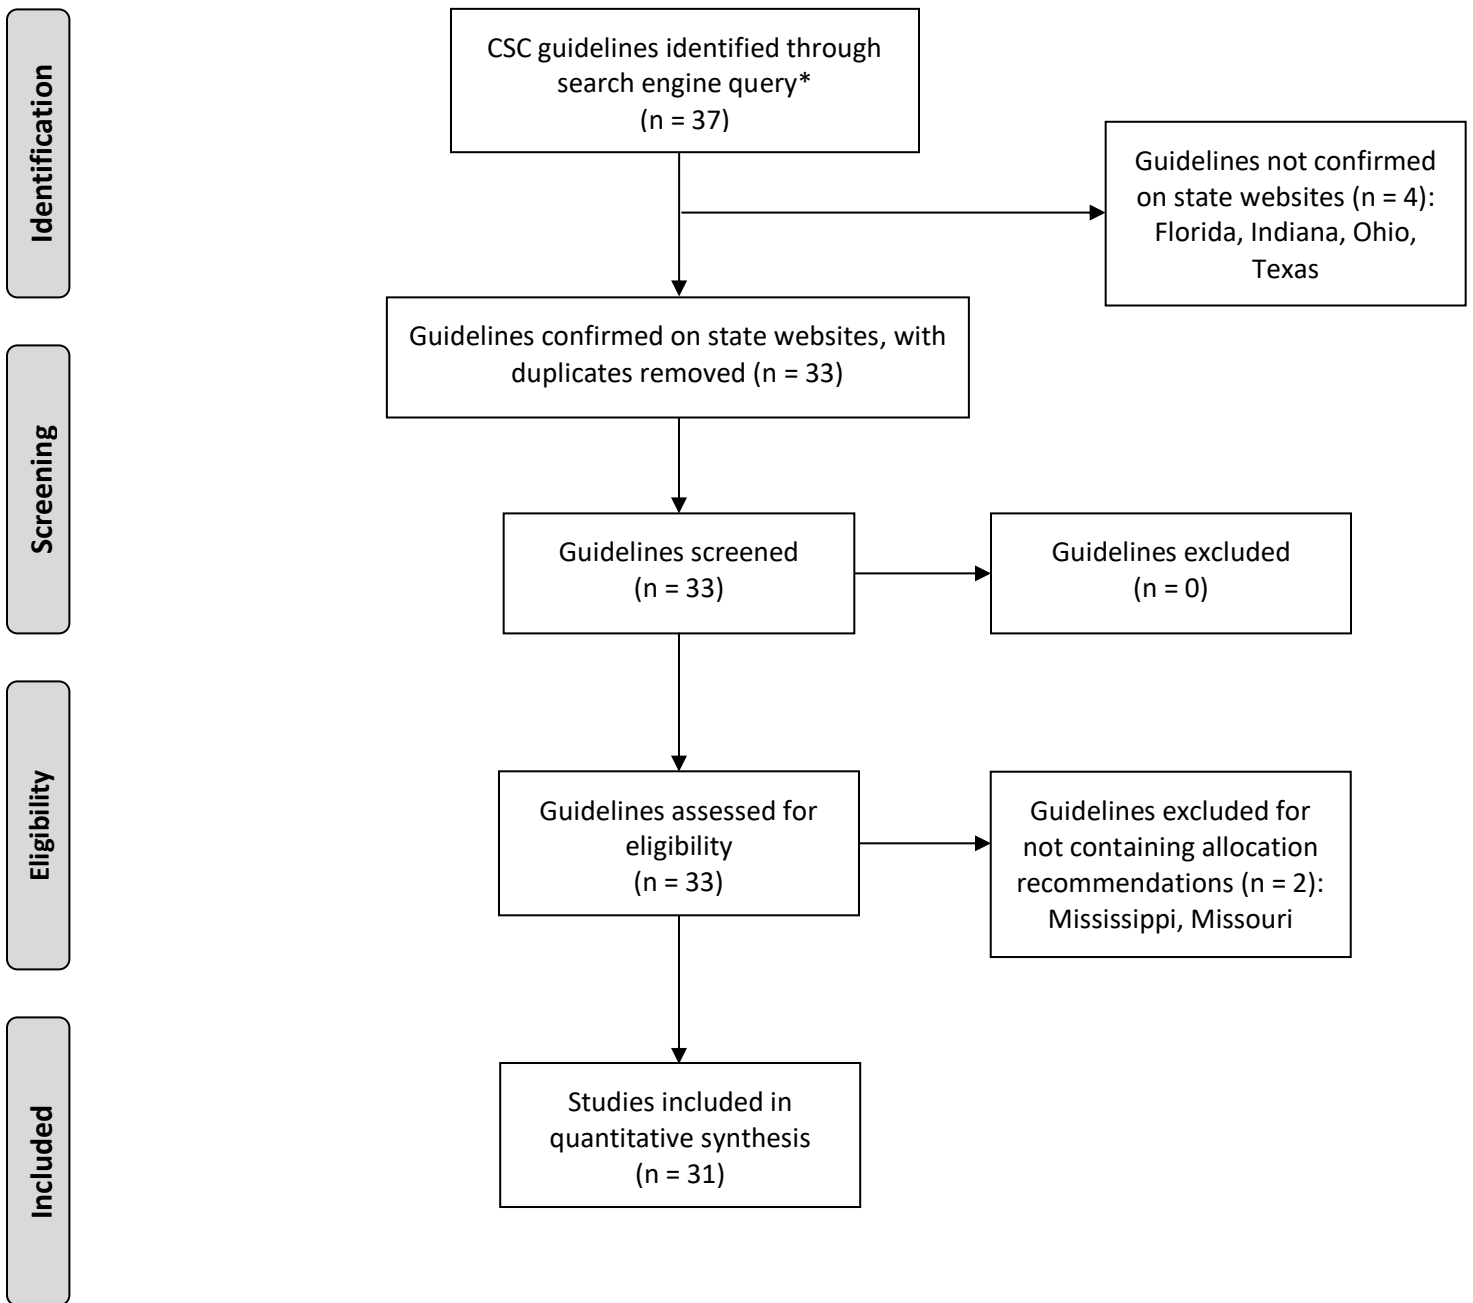

\*The same numbers of guidelines were found by both independent abstractors



**eTable 2.** CSC Guideline Versions Dates and Cancer-Related Categorizations

| State          | Month/Year of Guideline Version Abstracted | Cancer-Related Categorical Exclusion Present in CSC | Cancer-Related Deprioritization Present in CSC | Blood Product Allocation Present in CSC | Palliative Care Provision Present in CSC | NCI CCC Present in CSC | Disability Rights Statement Present in CSC | Oncologist/PC on CSC Taskforce* |
|----------------|--------------------------------------------|-----------------------------------------------------|------------------------------------------------|-----------------------------------------|------------------------------------------|------------------------|--------------------------------------------|---------------------------------|
| Alabama        | 2/2020                                     |                                                     |                                                |                                         | X                                        | X                      |                                            |                                 |
| Alaska         | 3/2020                                     |                                                     |                                                | X                                       | X                                        |                        |                                            | N/A                             |
| Arizona        | 3/2020                                     |                                                     |                                                | X                                       | X                                        | X                      | X                                          |                                 |
| California     | 4/2020                                     |                                                     |                                                | X                                       | X                                        | X                      | X                                          | N/A                             |
| Colorado       | 4/2020                                     |                                                     | X                                              | X                                       | X                                        | X                      | X                                          |                                 |
| Connecticut    | 10/2010                                    |                                                     |                                                |                                         |                                          | X                      |                                            |                                 |
| Illinois       | 4/2020                                     |                                                     |                                                |                                         | X                                        | X                      |                                            |                                 |
| Iowa           | 9/2007                                     |                                                     |                                                |                                         |                                          | X                      | X                                          |                                 |
| Kansas         | 9/2013                                     | X                                                   | X                                              |                                         | X                                        |                        |                                            |                                 |
| Kentucky       | 3/2020                                     | X                                                   |                                                |                                         | X                                        |                        | X                                          |                                 |
| Louisiana      | 9/2011                                     | X                                                   | X                                              |                                         | X                                        |                        |                                            | N/A                             |
| Maryland       | 8/2017                                     |                                                     | X                                              | X                                       | X                                        | X                      |                                            |                                 |
| Massachusetts  | 4/2020                                     |                                                     |                                                |                                         | X                                        | X                      | X                                          | X                               |
| Michigan       | 11/2012                                    |                                                     |                                                |                                         | X                                        | X                      |                                            | N/A                             |
| Minnesota      | 2/2020                                     |                                                     | X                                              | X                                       | X                                        | X                      | X                                          | N/A                             |
| Montana        | 4/2020                                     |                                                     | X                                              | X                                       | X                                        |                        | X                                          | N/A                             |
| Nevada         | 6/2017                                     |                                                     |                                                | X                                       | X                                        |                        | X                                          |                                 |
| New Hampshire  | 4/2020                                     |                                                     | X                                              | X                                       | X                                        | X                      | X                                          | X                               |
| New Jersey     | 4/2020                                     |                                                     |                                                |                                         | X                                        | X                      | X                                          | N/A                             |
| New Mexico     | 1/2018                                     |                                                     |                                                | X                                       | X                                        | X                      | X                                          |                                 |
| New York       | 11/2015                                    |                                                     | X                                              |                                         | X                                        | X                      | X                                          | X                               |
| North Carolina | 4/2020                                     |                                                     | X                                              |                                         | X                                        | X                      |                                            |                                 |
| Oklahoma       | 4/2020                                     |                                                     | X                                              | X                                       | X                                        |                        | X                                          | N/A                             |
| Oregon         | 6/2018                                     | X                                                   | X                                              |                                         | X                                        | X                      | X                                          |                                 |
| Pennsylvania   | 3/2020                                     |                                                     | X                                              | X                                       | X                                        | X                      | X                                          |                                 |
| Rhode Island   | 4/2020                                     | X                                                   |                                                | X                                       | X                                        |                        | X                                          |                                 |
| South Carolina | 9/2009                                     | X                                                   | X                                              |                                         | X                                        |                        |                                            |                                 |
| Tennessee      | 7/2016                                     | X                                                   | X                                              | X                                       | X                                        | X                      |                                            |                                 |
| Utah           | 1/2019                                     | X                                                   | X                                              | X                                       | X                                        | X                      | X                                          |                                 |
| Vermont        | 7/2019                                     |                                                     | X                                              | X                                       | X                                        |                        | X                                          | N/A                             |
| Washington     | 3/2020                                     |                                                     | X                                              | X                                       | X                                        | X                      | X                                          | N/A                             |

\*N/A: state website and guideline did not list taskforce membership / guideline authorship; CSC: crisis standards of care; PC: palliative care specialist

## eReferences

1. Abel GA, Cronin AM, Earles K, Gray SW. Accessibility and Quality of Online Cancer-Related Clinical Trial Information for Naive Searchers. *Cancer Epidemiol Biomarkers Prev* 2015;24:1629-31.
2. Lopez A, Detz A, Ratanawongsa N, Sarkar U. What patients say about their doctors online: a qualitative content analysis. *J Gen Intern Med* 2012;27:685-92.
3. Giacomini MK, Cook DJ. Users' guides to the medical literature: XXIII. Qualitative research in health care A. Are the results of the study valid? Evidence-Based Medicine Working Group. *JAMA : the journal of the American Medical Association* 2000;284:357-62.
